# Supplementary material for: Circadian Rhythms of Locomotor Activity Mediated by Cryptochrome 2 and Period 1 Genes in the Termites Reticulitermes chinensis and Odontotermes formosanus
Source: MDPI journal article supplement (doi:10.3390/insects15010001), 2023-12-19
Supplement: s1 [file s1]

## Supplementary information

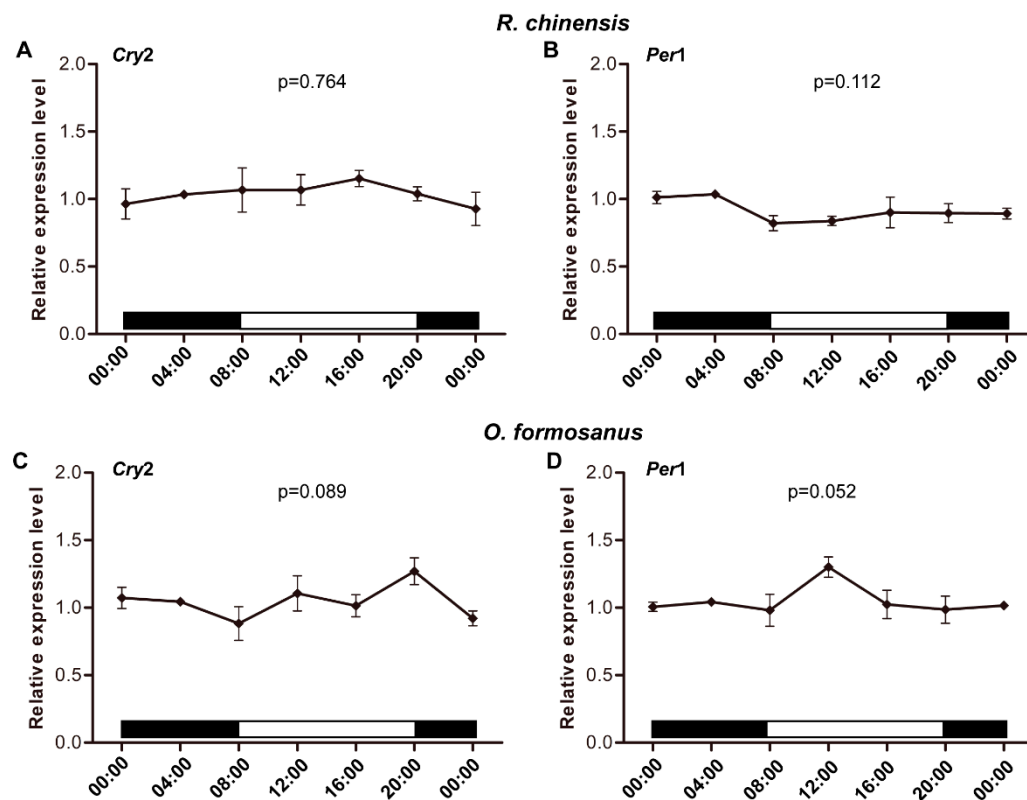

**Supplementary Figure 1. The patterns of *Cry2* and *Per1* genes expression in the two termite species. (A)** The patterns of *Cry2* expression in the termite *R. chinensis* under LD condition ( $n = 9$ ). **(B)** The patterns of *Per1* expression in the termite *R. chinensis* under LD condition ( $n = 9$ ). **(C)** The patterns of *Cry2* expression in the termite *O. formosanus* under LD condition ( $n = 9$ ). **(D)** The patterns of *Per1* expression in the termite *O. formosanus* under LD condition ( $n = 9$ ). The data in the figures are the mean  $\pm$  SEM, and different letters express significant differences according to Tukey's HSD test. The mRNA levels were normalized relative to the two termite species collected at 04: 00. White and black bars represent subjective day and subjective night, respectively.

**Supplementary Table S1. The distribution of the four colonies of *R. chinensis* for each experiment\***

| <b>Experiments</b>                              | <b>Replicates</b> | <b>Colonies</b> |
|-------------------------------------------------|-------------------|-----------------|
| Circadian rhythms of locomotor activity         | 9-10              | Number 1, 2, 3  |
| Expression of <i>Per1</i> and <i>Cry2</i>       | 8-9               | Number 2, 3, 4  |
| RNAi efficiency for <i>Per1</i> and <i>Cry2</i> | 4-7               | Number 2, 3, 4  |

\* All the four colonies of *R. chinensis* were collected from Shizi hill in Wuhan City, Hubei Province, China.

**Supplementary Table S2. The distribution of the seven colonies of *O. formosanus* for each experiment\***

| <b>Experiments</b>                              | <b>Replicates</b> | <b>Colonies</b> |
|-------------------------------------------------|-------------------|-----------------|
| Circadian rhythms of locomotor activity         | 9-10              | Number 1, 2, 3  |
| Expression of <i>Per1</i> and <i>Cry2</i>       | 8-9               | Number 2, 3, 4  |
| RNAi efficiency for <i>Per1</i> and <i>Cry2</i> | 4-7               | Number 5, 6, 7  |

\* All the seven colonies of *O. formosanus* were collected from Shizi hill in Wuhan City, Hubei Province, China.

**Supplementary Table S3. Primers used for qRT-PCR analyses**

| Species              | Gene Name      | Orientation | (5'→3') Primer Sequence |
|----------------------|----------------|-------------|-------------------------|
| <i>R. chinensis</i>  | $\beta$ -actin | Forward     | AGCGGTCACTCATTCCTTG     |
|                      |                | Reverse     | ATTCCTGACGTACTGTGC      |
|                      | <i>Hsp 70</i>  | Forward     | GCTAAGCGTCTTATTGGGCG    |
|                      |                | Reverse     | CTTTGGTTTTCCACCGTCGC    |
|                      | <i>Cry2</i>    | Forward     | AGTTCTTTGCACATGGCCG     |
|                      |                | Reverse     | CGTGAAGGACTGAACTCTGCT   |
|                      | <i>Per1</i>    | Forward     | CTTCAGCCAACCACAGCTCTA   |
|                      |                | Reverse     | TGGTTCCGCTTTCACGGATA    |
| <i>O. formosanus</i> | $\beta$ -actin | Forward     | CTGGAGAAGTCATACGAGTTG   |
|                      |                | Reverse     | AGAAGGAAGGCTGGAACA      |
|                      | <i>NADH</i>    | Forward     | TTGGTGAGATTGGTCTGCTG    |
|                      |                | Reverse     | ACAATGTGTAAGCCGCACTA    |
|                      | <i>Cry2</i>    | Forward     | TCTTACCCGTGGCGATCTCT    |
|                      |                | Reverse     | AAGCGCACTGGACAATAGCA    |
|                      | <i>Per1</i>    | Forward     | GGAACATTGCCATGGGGTCA    |
|                      |                | Reverse     | TCCTTGGCATAAAGGGGACAC   |

**Supplementary Table S4. Primers used for cloning the dsRNA template**

| Species              | Gene Name   | Orientation | (5'→3') Primer Sequence |
|----------------------|-------------|-------------|-------------------------|
| <i>R. chinensis</i>  | <i>Cry2</i> | Forward     | GAGGTGTCATTTTAGGGCGA    |
|                      |             | Reverse     | TTCAAGGAATGGGGCACTAC    |
|                      | <i>Per1</i> | Forward     | ACGAAGAGCCCTCTGGGATA    |
|                      |             | Reverse     | GCAGCATTGGACTGAACGTC    |
|                      | <i>GFP</i>  | Forward     | CTTGAAGTTGACCTTGATGCC   |
|                      |             | Reverse     | TGGTCCCAATTCTCGTGGAAC   |
| <i>O. formosanus</i> | <i>Cry2</i> | Forward     | TCGCCCTAAAATGACACCTC    |
|                      |             | Reverse     | CACCACGGGTAAGAAAGCAT    |
|                      | <i>Per1</i> | Forward     | CCTCATATTGAGGGAGGCAA    |
|                      |             | Reverse     | TGGGTTGTTGTACTGGCAAA    |
|                      | <i>GFP</i>  | Forward     | CTTGAAGTTGACCTTGATGCC   |
|                      |             | Reverse     | TGGTCCCAATTCTCGTGGAAC   |
